# Supplementary material for: A revision of &lt;i&gt;Ophidiaster davidsoni&lt;/i&gt; de Loriol and Pellat 1874 from the Tithonian of Boulogne (France) and its transfer from the Valvatacea to the new forcipulatacean genus &lt;i&gt;Psammaster&lt;/i&gt; gen. nov.
Source: Copernicus journal article supplement (doi:10.5194/fr-23-141-2020), 2020-07-28
Supplement: Supplementary file 1 [file fr-23-141-2020-supplement.zip]

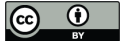

## *Supplement of*

# **A revision of *Ophidiaster davidsoni* de Loriol and Pellat 1874 from the Tithonian of Boulogne (France) and its transfer from the Valvatacea to the new forcipulatacean genus *Psammaster* gen. nov.**

**Marine Fau et al.**

*Correspondence to:* Marine Fau ([marine.fau@unifr.ch](mailto:marine.fau@unifr.ch))

- [fr-23-141-2020-supplement-title-page.pdf](#)
- [Fau&Villier\\_Pdavidsoni.nex](#)

The copyright of individual parts of the supplement might differ from the CC BY 4.0 License.
